# Supplementary material for: Co-option of neurotransmitter signaling for inter-organismal communication in C. elegans
Source: PubMed Central journal article supplement (PMC6639374; doi:10.1038/s41467-019-11240-7), 2019-07-18
Supplement: 41467_2019_11240_MOESM1_ESM.pdf [file 41467_2019_11240_MOESM1_ESM.pdf]

**Co-option of neurotransmitter signaling for inter-organismal communication  
in *C. elegans***

Chute et al.

**A**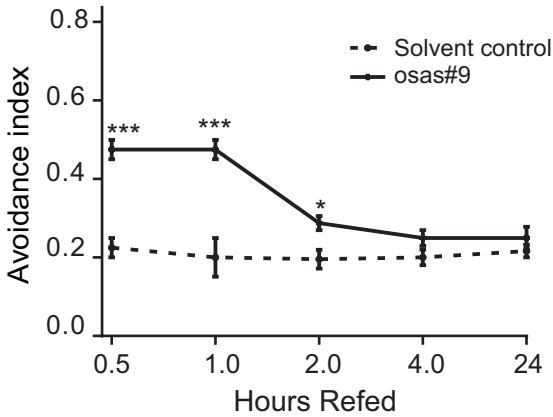**B**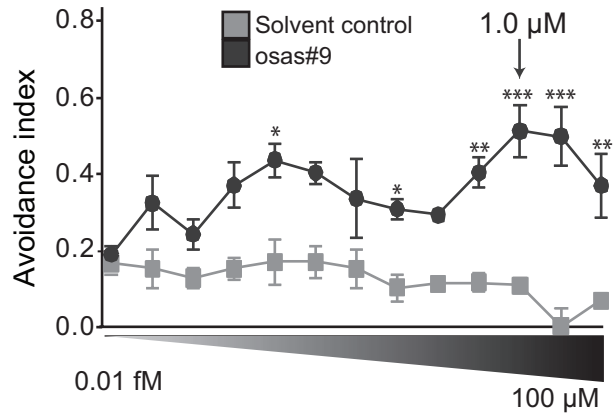

**Supplementary Figure 1. A)** Attenuation of osas#9 avoidance response by *E. coli* OP50. Animals reintroduced to *E. coli* OP50 for two hours exhibited an reduced avoidance response to osas#9, with complete attenuation at four hours,  $n \geq 3$  trials. **B)** osas#9 exhibits avoidance response over a broad range of concentrations (fM -  $\mu$ M) in YA wild type animals,  $n \geq 3$  trials. Data presented as mean  $\pm$  S.E.M; \*  $p < 0.05$ , \*\*  $p < 0.01$ , \*\*\*  $p < 0.001$ , one factor ANOVA with Sidak's multiple comparison posttest. Asterisks displayed without bar depict compared osas#9 avoidance to respective solvent control within groups.

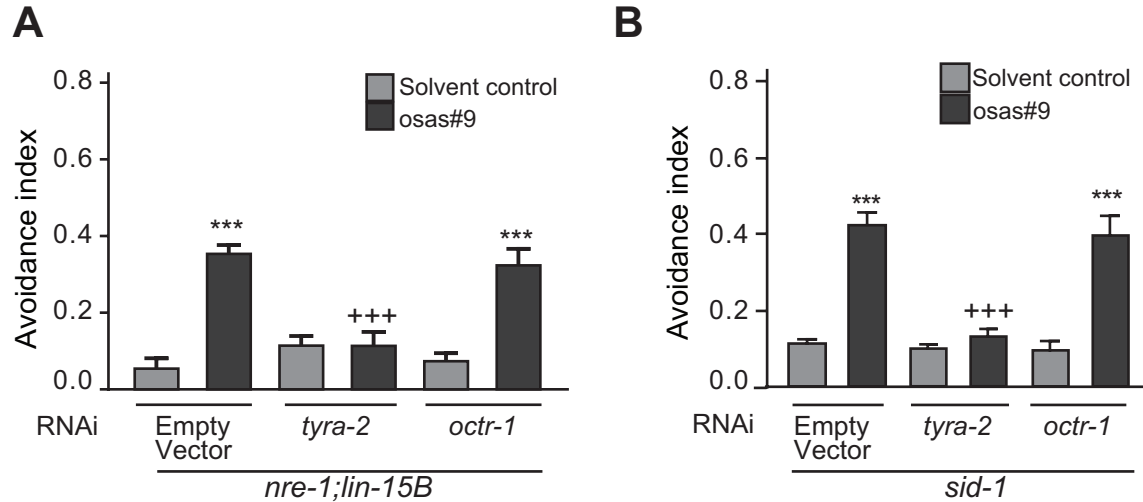

**Supplementary Figure 2. A-B)** *tyra-2* RNAi knockdown results in loss of avoidance to osas#9. Animals cultured at 15 °C and fed *tyra-2* RNAi clones were defective in response to osas#9 in two different RNAi sensitive backgrounds **A)** *nre-1(hd20);lin-15B(hd126)*.  $n \geq 10$ . **B)** *sid-1(pk3321)*.  $n \geq 3$ . Data presented as mean  $\pm$  S.E.M; \*\*\*  $p < 0.001$ . Asterisks depict comparison between test solution and respective solvent control. '+' signs represent same p-value as asterisks, but representing difference between response of a strain/conditions in comparison to wild type.

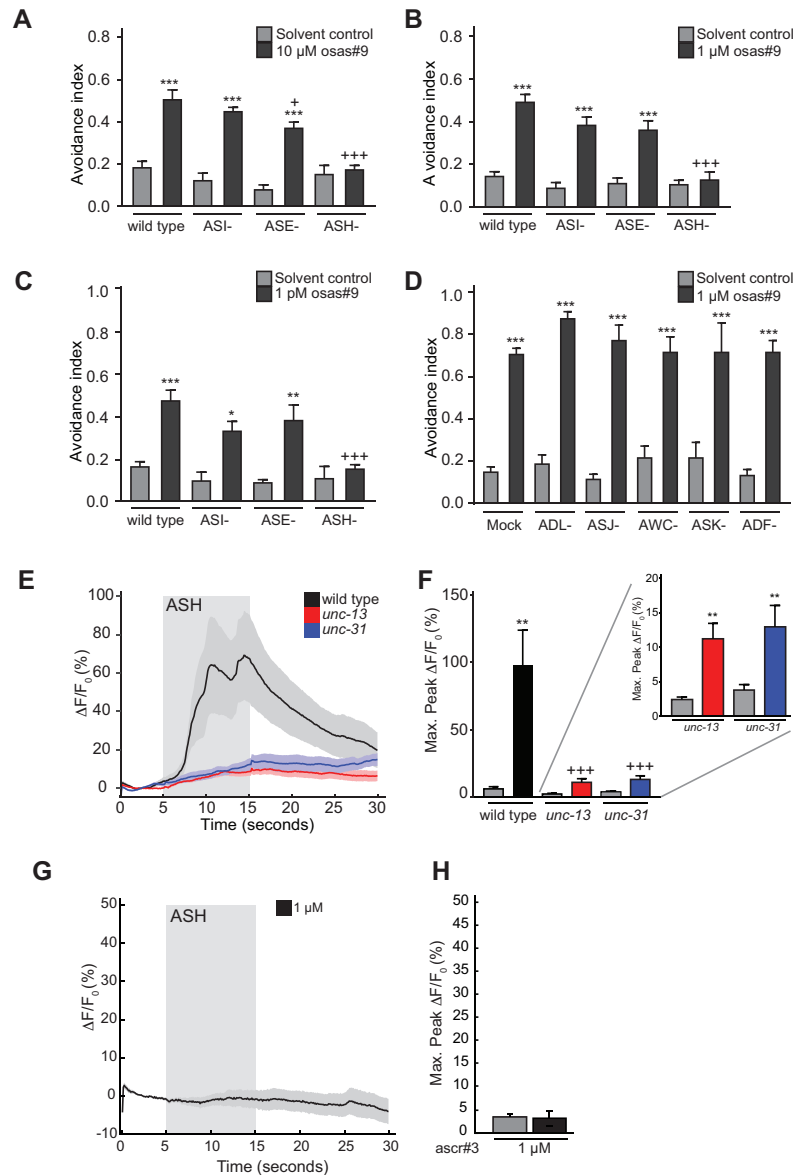

**Supplementary Figure 3.** Role of different sensory neurons in osas#9 avoidance behavior. **A-C)** Genetically ablated ASH, ASI, and ASE neurons were tested for their response to various concentration of osas#9: **A)** 10  $\mu$ M, **B)** 1  $\mu$ M, and **C)** 1 pM.  $n \geq 3$  trials. **D)** Sensory neurons not required for osas#9 avoidance. Note that ADL is not required for osas#9 avoidance. All ablated animals were tested with at least 10 animals with the exception of ADF, for which 7 animals were tested. **E,F)** ASH neurons exhibit significant calcium transients upon 1  $\mu$ M osas#9 stimulation in both *unc-13* and *unc-31* mutant background. However, the dynamics of the calcium change in both mutant backgrounds are distinct from wild type animals in both magnitude and OFF response upon stimulus removal. **G)** ASH calcium transients are osas#9 specific. Exposure to an unrelated ascaroside, 1  $\mu$ M *ascr#3* (black), does not elicit calcium transients in the ASH neuron (exposure, gray-shaded region),  $n = 19$  animals. **H)** Maximum fluorescence intensity in transgenic worms before (solvent control) and during exposure to 1  $\mu$ M *ascr#3*. Data presented as mean  $\pm$  S.E.M; \*  $p < 0.05$ , \*\*  $p < 0.01$ , \*\*\*  $p < 0.001$ , one factor ANOVA with Sidak's multiple comparison posttest.

Asterisks depict comparison between test solution and respective solvent control. '+' signs represent same p value as asterisks but representing difference between response of a strain/conditions in comparison to wild type.

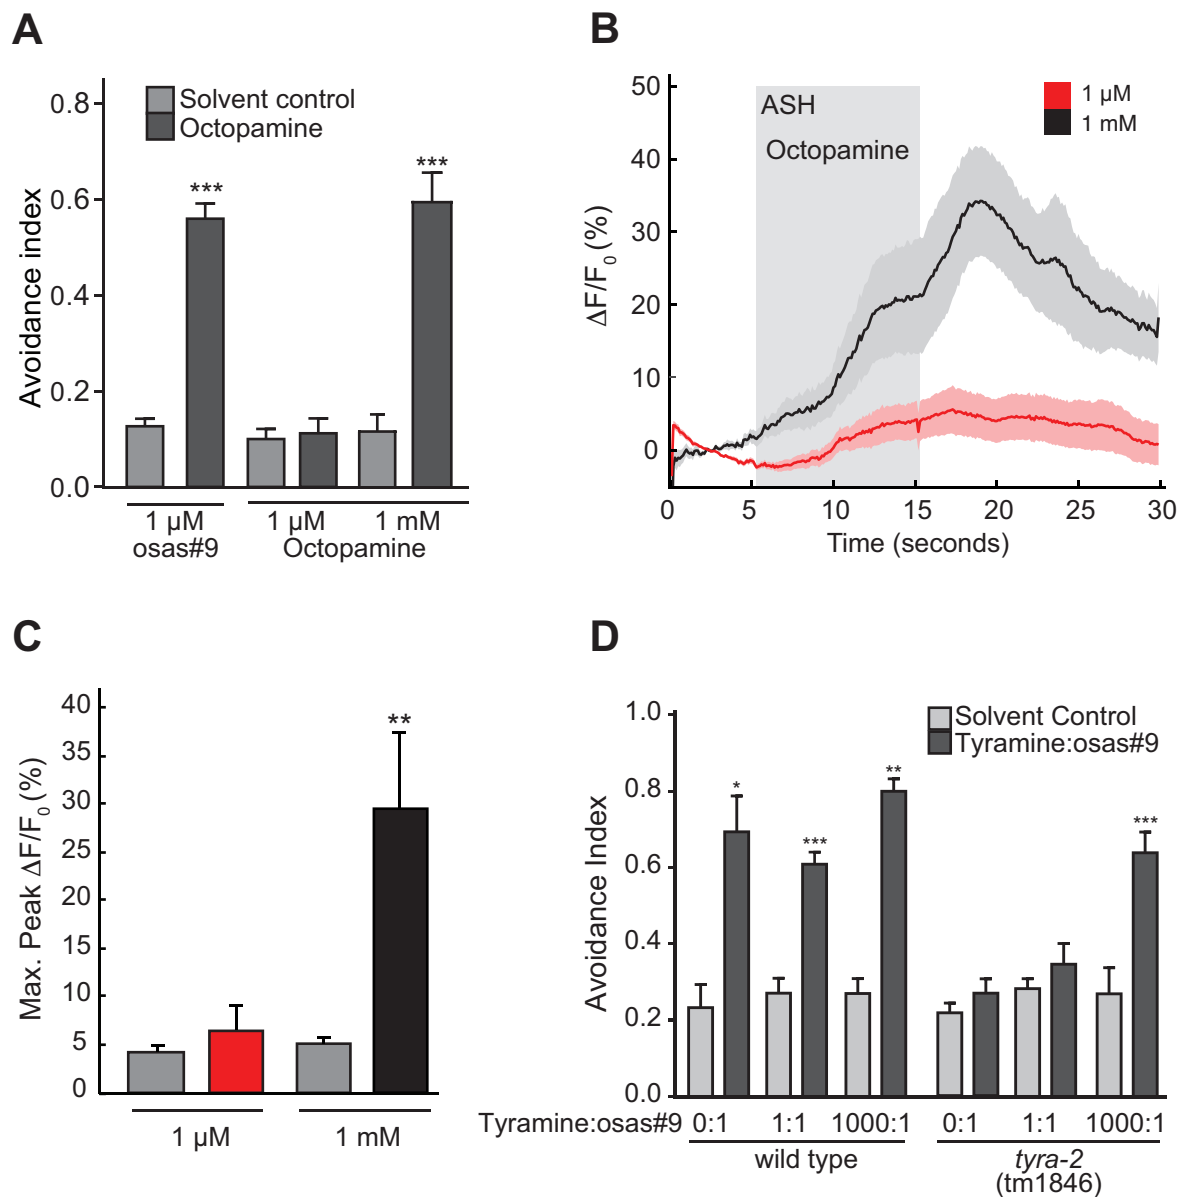

**Supplementary Figure 4.** Octopamine elicits avoidance at high concentrations. **A)** Animals do not avoid 1  $\mu$ M octopamine but does avoid 1 mM octopamine.  $n \geq 3$  trials. **B)** Calcium dynamics in ASH sensory neurons upon exposure (gray-shaded region) to 1  $\mu$ M (red) and 1 M (black) octopamine.  $n \geq 10$  animals. **C)** Maximum fluorescence intensity in transgenic worms before (solvent control) and during exposure to octopamine. **D)** Wild type and *tyra-2*(tm1846) animals were exposed to mixtures of tyramine and osas#9. In each mixture, the concentration of osas#9 was consistent at 1  $\mu$ M. Tyramine was added in increasing ratios of 0:1 (no tyramine), 1:1 (1  $\mu$ M tyramine), and 1000:1 (1 mM tyramine). Wild type animals avoided every ratio mixture of cues, while *tyra-2*(tm1846) animals only avoided 1000:1.  $N = 5$  trials, Tyramine:osas#9 avoidances were compared against paired solvent control values via a Student's t-test. Data presented as mean  $\pm$  S.E.M; \*  $p < 0.05$ , \*\*  $p < 0.01$ , \*\*\*  $p < 0.001$ , Student's t-test. Asterisks depict compared solution of interest to the solvent control.

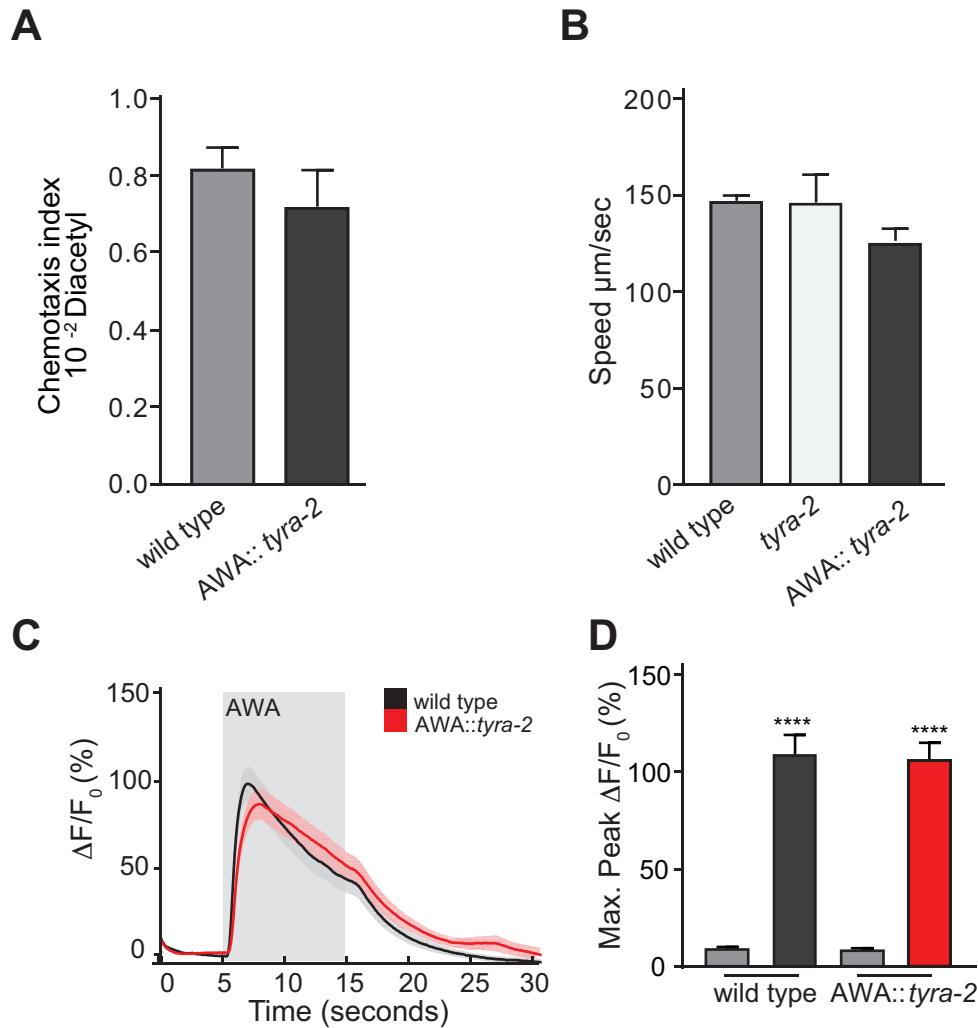

**Supplementary Figure 5.** Ectopic expression of *tyra-2* in AWA neurons does not affect AWA-specific behaviors. **A)** Chemotaxis to  $10^{-2}$  diacetyl was unaffected by AWA::*tyra-2*.  $n \geq 7$ . **B)** Locomotory behaviors were unaltered in AWA::*tyra-2* animals. Wild type, *tyra-2 lof*, and AWA::*tyra-2* speeds are not statistically different.  $n \geq 3$  trials. Data presented as mean  $\pm$  S.E.M. Panel S6A, Student's t-test, Panel S6B, one factor ANOVA with Sidak's multiple comparison posttest. **C)** AWA::GCaMP2.2b animals (black) and AWA::*tyra-2*::GCaMP2.2b animals (red) show depolarization when exposed to  $10^{-2}$  diacetyl in a microfluidic olfactory chip. Shaded gray region depicts time when animals were subjected to the stimulus,  $n \geq 8$  animals. **D)** Maximum peak fluorescence before (solvent control) and during exposure to  $10^{-2}$  diacetyl. Data presented as mean  $\pm$  S.E.M; \* $P < 0.05$ , \*\* $P < 0.01$ , \*\*\*\* $P < 0.0001$ . Asterisks displayed without bar depict compared osas#9 avoidance response to the solvent control.

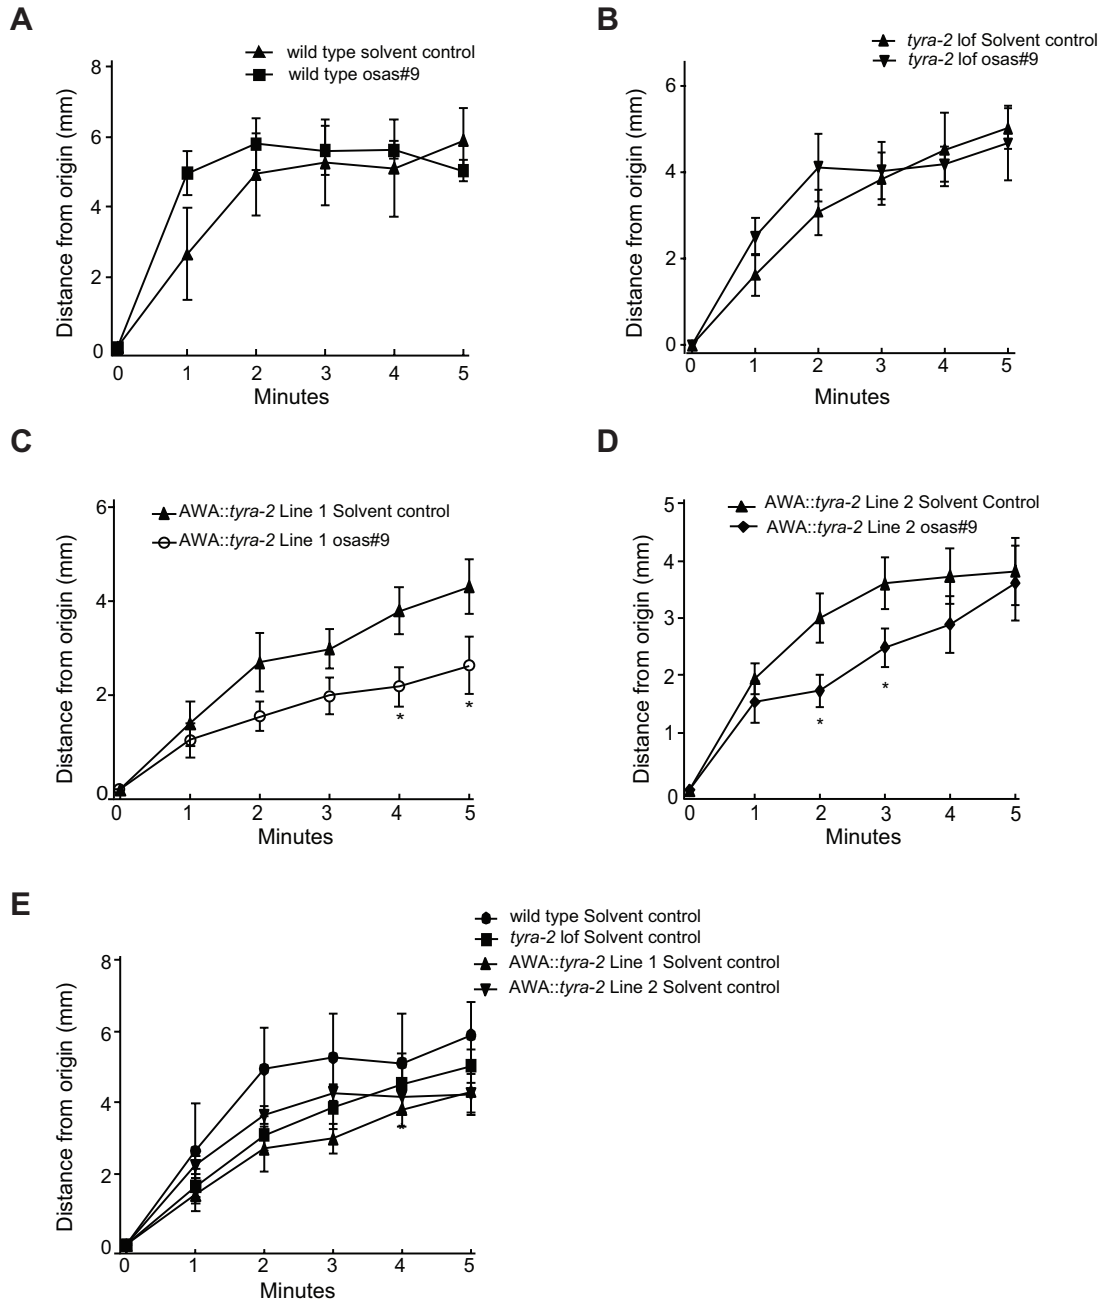

**Supplementary Figure 6.** Leaving rates for animals expressing *tyra-2* ectopically in AWA neurons are slower than both wild type and *tyra-2 lof* animals at 10 pM osas#9. **A)** Wild type.  $n \geq 3$  trials. **B)** *tyra-2*.  $n = 6$  trials. **C,D)** Two different lines of AWA::*tyra-2* display slower leaving rates at 10 pM osas#9.  $n \geq 6$  trials Line 1, and  $n \geq 7$  trials Line 2. **E)** Comparison of solvent control for all strains in leaving assay. None of the animals varied in their response.  $n \geq 3$  trials. Data presented as mean  $\pm$  S.E.M; \*  $p < 0.05$ , one factor ANOVA with Sidak's multiple comparison posttest.



| Source     | Strain  | Genotype (allele)                                                       | Avoid osas#9? |
|------------|---------|-------------------------------------------------------------------------|---------------|
| CGC        | CB1489  | <i>him-8</i> (e1489)                                                    | yes           |
| Komuniecki | FX01846 | <i>tyra-2</i> (tm1846)                                                  | no            |
| Komuniecki | OH313   | <i>ser-2</i> (pk1357)                                                   | yes           |
| Suo        | VN280   | <i>ser-6</i> (2146)                                                     | yes           |
| Alkema     | QW569   | <i>octr-1</i> (ok371)                                                   | yes           |
| Komuniecki | DA1774  | <i>ser-3</i> (ad1774)                                                   | yes           |
| Chase      | LX702   | <i>dop-2</i> (vs105)                                                    | yes           |
| Chase      | LX703   | <i>dop-3</i> (vs106)                                                    | yes           |
| Alkema     | QW284   | <i>tdc-1</i> (n3420)                                                    | yes           |
| Alkema     | CX11839 | <i>tyra-3</i> (ok325)                                                   | yes           |
| Ambros     | NL3321  | <i>sid-1</i> (pk3321)                                                   | yes           |
| Sternberg  | PT839   | <i>osm-9</i> (ky10); <i>him-5</i> (e1490)                               | no            |
| Bargmann   | CX7265  | <i>osm-9</i> (ky10) IV;yzEx53 [ <i>osm-10::osm-9, elt-2::gfp</i> ]      | yes           |
| Srinivasan | JSR19   | <i>tyra-2</i> (tm1846);worEx12[pLR306_ <i>pnhr-79_tyra-2</i> ]          | yes           |
| Srinivasan | JSR23   | N2;worEx13[ <i>ptyra-2::tyra-2::GFP</i> ]                               | n.d.          |
| Alkema     | QW1853  | <i>tyra-2</i> (tm1846);worEx14[ <i>ptyra-2::tyra-2::GFP @ 1ng/μL</i> ]  | yes           |
| Srinivasan | JSR45   | <i>tyra-2</i> (tm1846);worEx15[pLR305_ <i>podr-10_tyra-2</i> ]          | no            |
| Srinivasan | JSR47   | <i>tyra-2</i> (tm1846);worEx15[pLR305_ <i>podr-10_tyra-2</i> ]          | no            |
| Srinivasan | JSR50   | <i>tyra-2</i> (tm1846) ;KyEx2865 [ <i>psra-6::GCAMP3 @ 100 ng/μL</i> ]) | n.d.          |
| Srinivasan | JSR51   | JSR45;kyls598 [ <i>gpa-6::GCAMP2.2b 50 ng/μL</i> ]                      | n.d.          |
| Srinivasan | JSR100  | <i>tyra-2</i> (tm1846);KyEx2865 [ <i>psra-6::GCAMP3 @ 100 ng/μL</i> ])  | n.d.          |
| Srinivasan | JSR104  | JSR100;( <i>tyra-2</i> (tm1846);worEx12[pLR306_ <i>pnhr-79_tyra-2</i> ] | n.d.          |
| Srinivasan | JSR105  | <i>unc-13</i> (e51);KyEx2865[ <i>psra-6::GCAMP3</i> ]                   | n.d.          |
| Srinivasan | JSR106  | <i>unc-31</i> (e928);KyEx2865[ <i>psra-6::GCAMP3</i> ]                  | n.d.          |
| Bargmann   | CX10979 | N2;KyEx2865 [ <i>psra-6::GCAMP3 @ 100 ng/μL</i> ])                      | n.d.          |
| Albrecht   | CX14887 | N2;kyls598 [ <i>gpa-6::GCAMP2.2b 50 ng/μL</i> ]                         | n.d.          |

**Supplementary Table 1.** List of Strains used in this study

| <b>Source</b>   | <b>Construct</b> | <b>Notes</b>                      |
|-----------------|------------------|-----------------------------------|
| Fire vector kit | pPD95_75         | GFP                               |
| Rene Garcia     | pLR305           | destination vector                |
| Rene Garcia     | pLR306           | destination vector                |
| Rene Garcia     | pLR304           | destination vector                |
| Srinivasan      | JSR#CDC8         | <i>gpa-6</i> entry clone          |
| Srinivasan      | JSR#CDC9         | ASH:: <i>GPA-6</i>                |
| Srinivasan      | JSR#CDC2         | <i>tyra-2</i> entry clone         |
| Srinivasan      | JSR#CDC1         | <i>pnhr-79</i> entry clone        |
| Srinivasan      | JSR#CDC4         | <i>podr-10</i> entry clone        |
| Srinivasan      | JSR#CDC3         | ASH::TYRA-2                       |
| Srinivasan      | JSR#CDC6         | AWA::TYRA-2                       |
| Srinivasan      | JSR#CDC24        | <i>pgpa-6::gpa-6::RFP::unc-54</i> |
| Vidal Library   | F01E11.5         | <i>tyra-2</i> RNAi clone          |
| Vidal Library   | F14D12.6         | <i>octr-1</i> RNAi clone          |
| Vidal Library   | pL4440           | Empty RNAi clone                  |

**Supplementary Table 2.** List of Plasmids used in this study

| Purpose                                     | Gene                                | Primer                                             | Sequence                                                   |
|---------------------------------------------|-------------------------------------|----------------------------------------------------|------------------------------------------------------------|
| <i>tyra-2</i> ASH rescue construct          | <i>tyra-2</i> (from genomic)        | F                                                  | attB5 <i>ggcttatccggttgga gaa</i>                          |
|                                             |                                     | R                                                  | attB2 <i>tggccctcctttctctt</i>                             |
| <i>tyra-2</i> ASH rescue                    | <i>pnhr-79</i> (from genomic)       | F                                                  | attB1 <i>gtgcaatgcatggaa aattg</i>                         |
|                                             |                                     | R                                                  | attB5 <i>ratacacttcccacgc accat</i>                        |
| <i>tyra-2</i> translational fusion (PCR)    | <i>tyra-2</i> (from genomic)        | F                                                  | <i>atgtttcacaagttcaccac a</i>                              |
|                                             |                                     | F nested                                           | <i>tcacaagttcaccacattac aa</i>                             |
|                                             |                                     | R (w overhang in caps)                             | <i>AGTCGACCTGCAGG CATGCAAGCT gacacgagaagttgagctg ggttc</i> |
|                                             | <i>GFP</i> (pPD95_75)               | as found on wormbook chapter: reporter gene fusion |                                                            |
| AWA <i>tyra-2</i> misexpression             | <i>podr-10</i> (from genomic)       | F                                                  | attB1 <i>ctcgctaaccactcgg tcat</i>                         |
|                                             |                                     | R                                                  | attB5 <i>rgtcaactagggtaat ccacaattc</i>                    |
| RT-qPCR                                     | <i>ama-1</i>                        | F                                                  | GGAGATTAACGCA TGTCAGTG                                     |
|                                             |                                     | R                                                  | ATGTCATGCATCTTC CACGA                                      |
|                                             | <i>tyra-2</i>                       | F                                                  | GAGGAGGAAGAAGA TAGCGAAAG                                   |
|                                             |                                     | R                                                  | TGTGATCATCTCGC TTTTCA                                      |
| <i>gpa-6</i> ASH rescue                     | <i>gpa-6</i> (from genomic)         | F                                                  | attB5 <i>cgctctttcgttcagggtgat</i>                         |
|                                             |                                     | R                                                  | attB2 <i>tatttcaagcgaacaaa aa</i>                          |
| <i>gpa-6</i> translational fusion (plasmid) | <i>pgpa-6::gpa-6</i> (from genomic) | F                                                  | <i>acatctggtacccctcaattc ccacgatct</i>                     |
|                                             |                                     | R                                                  | <i>acatctaccggtctcatgtaat ccagcagacc</i>                   |
|                                             | <i>unc-122::RFP</i>                 | F                                                  | <i>acatctaccggtATGGTG CGCTCCTCCAAG</i>                     |
|                                             |                                     | R                                                  | <i>ttaataggtaccTGGTCA TAGCTGTTTCCTGT G</i>                 |

**Supplementary Table 3.** List of Primers used in this study
